# Supplementary material for: Brain Perfusion Alterations Induced by Standalone and Combined Non-Invasive Brain Stimulation over the Dorsolateral Prefrontal Cortex
Source: MDPI journal article supplement (doi:10.3390/biomedicines10102410), 2022-09-27
Supplement: s1 [file s1]

## **Supplementary Material**

**Figure S1. Prefrontal cortex based on the Sallet Atlas (Sallet et al. 2013).**

**Figure S2. Neuronavigated coordinates overlapping Brodmann areas 9/46D and 9/46V.**

**Figure S3. Flowchart.**

**Table S1. Demographic and baseline measures.**

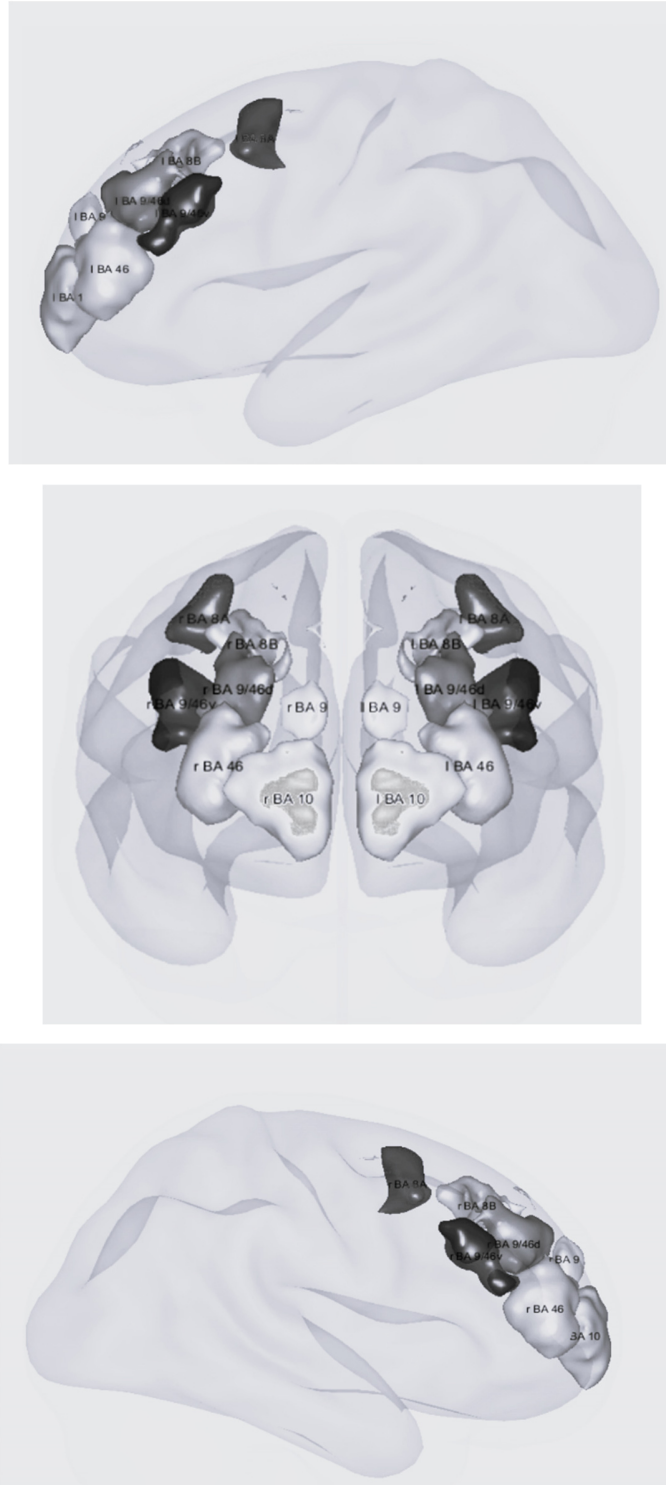

**Figure S1. Prefrontal cortex based on the Sallet Atlas (Sallet et al. 2013).** Seven dorsolateral prefrontal cortex sub-regions used in our analyses, corresponding to: brodmann area (BA) 9, BA 10, BA 9/46D and BA 9/46V, BA 46, BA 8A and BA 8B.

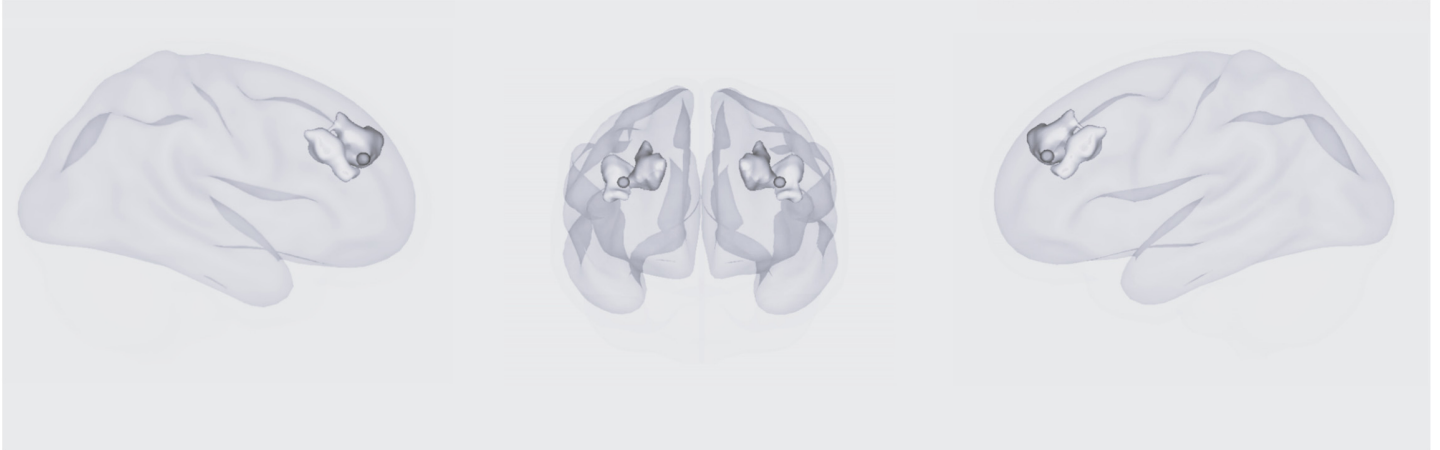

**Figure S2. Neuronavigated coordinates overlapping Brodmann areas 9/46D and 9/46V.**

Neuronavigated coordinates were based on the MNI152 stereotaxic atlas (coordinates, -38, +44, +26 and +38, +44, +26). Note: The circular areas correspond to the left and right MNI coordinates (targeted DLPFC), while the light gray corresponds to the BA 9/46V region and the dark gray corresponds to the BA 9/46D region.

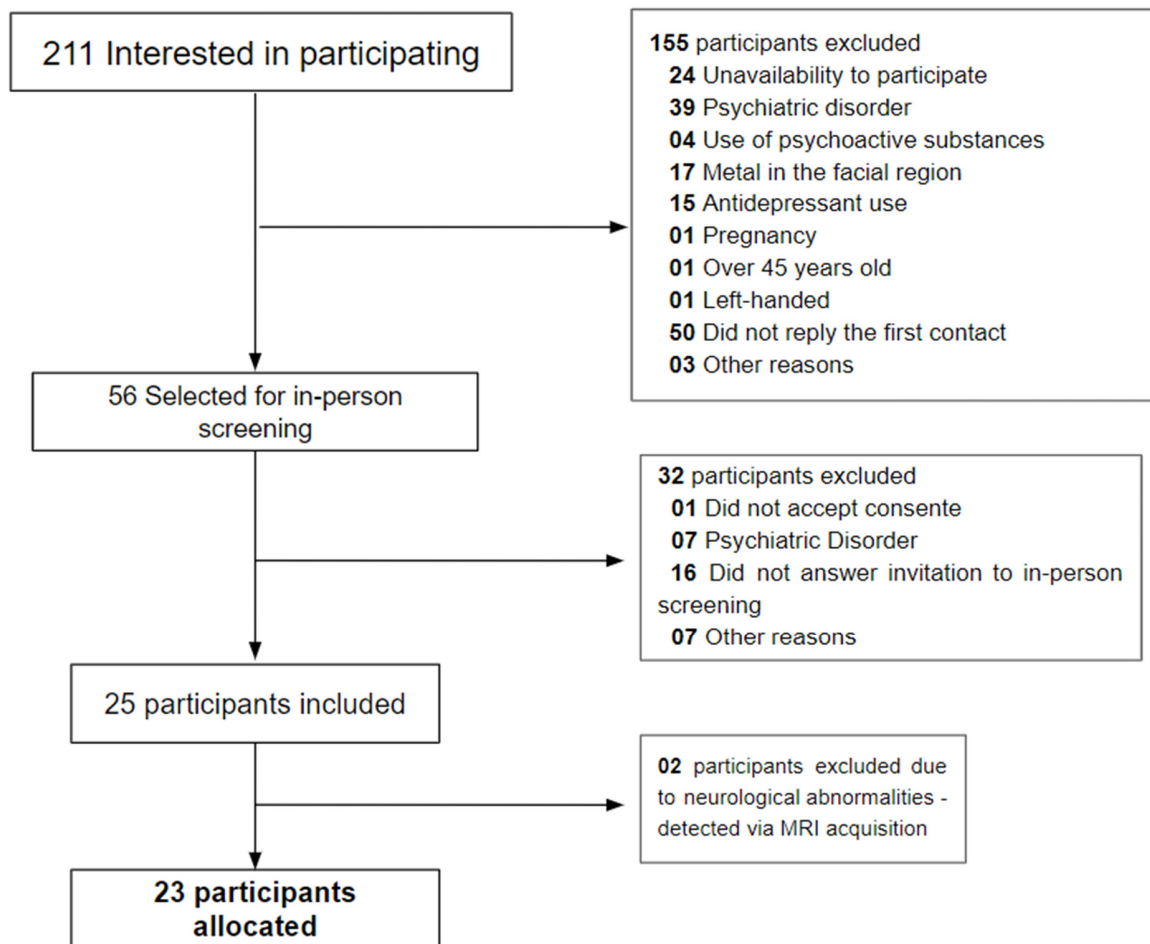

**Figure S3. Flowchart.**

**Table S1. Demographic and baseline measures.**

| Right sACC              |              |                     |              |
|-------------------------|--------------|---------------------|--------------|
| Predictors              | Estimates    | 95% CI              | p            |
| iTBS                    | -9.15        | -21.65 – 3.34       | 0.149        |
| tDCS                    | -7.68        | -20.46 – 5.09       | 0.235        |
| sex                     | 8.63         | -14.02 – 31.28      | 0.45         |
| age                     | -0.24        | -1.69 – 1.22        | 0.748        |
| HDRS                    | 2.51         | -1.78 – 6.80        | 0.248        |
| PA                      | -0.04        | -1.14 – 1.07        | 0.948        |
| NA                      | -0.35        | -2.21 – 1.50        | 0.706        |
| <b><i>iTBS*tDCS</i></b> | <b>19.82</b> | <b>2.23 – 37.41</b> | <b>0.028</b> |

| Left sACC  |           |              |       |
|------------|-----------|--------------|-------|
| Predictors | Estimates | 95% CI       | p     |
| iTBS       | 0.66      | -0.89 – 2.20 | 0.4   |
| tDCS       | -0.03     | -1.54 – 1.48 | 0.971 |
| sex        | 1.27      | -1.13 – 3.67 | 0.294 |
| age        | 0         | -0.15 – 0.15 | 0.996 |
| HDRS       | 0.21      | -0.30 – 0.72 | 0.41  |
| PA         | 0.08      | -0.05 – 0.21 | 0.236 |
| NA         | -0.1      | -0.32 – 0.11 | 0.353 |
| iTBS*tDCS  | -0.48     | -2.61 – 1.65 | 0.656 |

| Right ROI 9/46V, 9/46D |           |                |       |
|------------------------|-----------|----------------|-------|
| Predictors             | Estimates | 95% CI         | p     |
| iTBS                   | 1.85      | -21.75 – 25.46 | 0.876 |
| tDCS                   | 15.86     | -7.27 – 38.98  | 0.176 |
| sex                    | -16.47    | -54.35 – 21.40 | 0.389 |
| age                    | -3.06     | -5.49 – -0.62  | 0.014 |
| HDRS                   | -0.43     | -8.28 – 7.42   | 0.913 |
| PA                     | 0.45      | -1.54 – 2.44   | 0.651 |
| NA                     | -1.71     | -5.04 – 1.62   | 0.31  |
| iTBS*tDCS              | -3.41     | -35.95 – 29.13 | 0.835 |

| Left sACC  |           |              |       |
|------------|-----------|--------------|-------|
| Predictors | Estimates | 95% CI       | p     |
| iTBS       | 0.66      | -0.89 – 2.20 | 0.4   |
| tDCS       | -0.03     | -1.54 – 1.48 | 0.971 |
| sex        | 1.27      | -1.13 – 3.67 | 0.294 |
| age        | 0         | -0.15 – 0.15 | 0.996 |
| HDRS       | 0.21      | -0.30 – 0.72 | 0.41  |
| PA         | 0.08      | -0.05 – 0.21 | 0.236 |
| NA         | -0.1      | -0.32 – 0.11 | 0.353 |
| iTBS*tDCS  | -0.48     | -2.61 – 1.65 | 0.656 |

\*: interaction between iTBS and tDCS

## Reference

1. Sallet, J.; Mars, R.; Noonan, M.P.; Neubert, F.-X.; Jbabdi, S.; O'Reilly, J.; Filippini, N.; Thomas, A.; Rushworth, M. The Organization of Dorsal Frontal Cortex in Humans and Macaques. *J. Neurosci.* **2013**, *33*, 12255–12274. <https://doi.org/10.1523/jneurosci.5108-12.2013>.
